# Supplementary material
Source: publisher site journal article supplement (https://www.dovepress.com/article/373393)
Supplement: Supplementary file 1 [file get_supplementary_file.php]

## **Multimedia Appendix 1. Sample questions for the semistructured interviews.**

### **Patients**

1. Do you or your family think this software is easy to use?
2. Can you talk about the process and content of the nurse's guidance on how to use this app?
3. What is the biggest challenge for you or your family in using the app?
4. Can you talk about the advantages and disadvantages of the App?
5. Can you talk about the further expectations of the App?

### **Nurses**

1. What type of tasks do you give your patients to conduct their volume balance monitoring at home?
2. What types of information should be delivered via I-Self-Care?
3. What is the greatest challenge in teaching patients to use I-Self-Care?
4. What is the biggest challenge for you to use I-Self-Care?
5. What are the advantages and disadvantages of I-Self-Care?
6. What are the further expectations for the use of I-Self-Care?

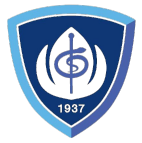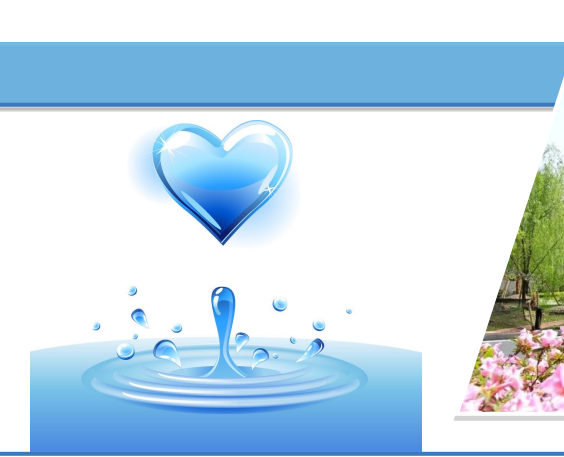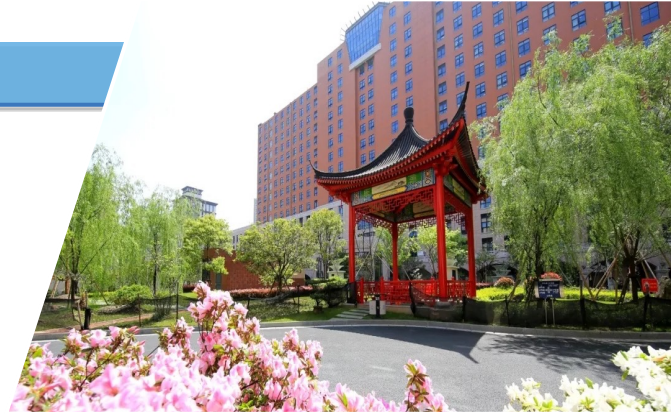

# **README FILE OF I-Self-Care**

*How to do fluid balance management  
for patients with heart failure*

**Shanghai China**

**Zhongshan Hospital, Fudan university**

# **PART ONE**

**For the**

**Patient**

# How to log in?

**Method 1: Click the login link:**

<https://fluid.zs-hospital.sh.cn/>

**Method 2: Scan the WeChat QR code:**

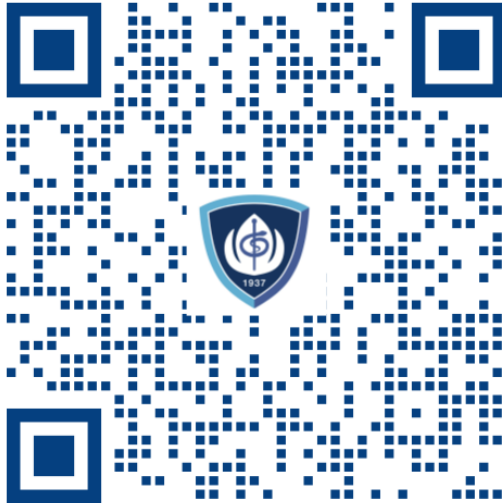

# How to log in?

**Account No.:** medical record No.

**Password:** last 4 digits of ID card

中山医院出入水量自管理App

**Account No.** → \*住院号 请输入住院号

**Password** → \*身份证后4位 请输入身份证最后4位

**Remember info** →  记住上述信息

**Login** → 登录

© 复旦大学附属中山医院

# How to Record?

**Fluid intake:** Select dining according to your situation

**Fluid outflow:** Enter the number according to your situation

The screenshot shows the 'liquid-app' interface for recording fluid intake and outflow. The interface is in Chinese and includes the following sections:

- Basic info:** 基本信息 (Basic Information). Includes a patient ID (床号: 43) and admission time (入院时间: 2016-12-18).
- Time of input:** 录入时间 (Input Time). Shows 2022-04-13 20:18:52.
- Fluid intake:** 食物入水量(毫升) (Food Intake in ml). Includes a prompt to select food consumed during the current session.
- Select dining:** 早餐 (Breakfast), 午餐 (Lunch), 晚餐 (Dinner). Includes buttons for 加餐 (Add meal) and 水和饮品 (Drinks/Water and Beverages).
- Fluid outflow:** 出水量(毫升) (Output in ml). Includes a prompt to manually input output volume.
- Urine:** 尿量 (Urine volume). Input field shows 0. Includes a 清空 (Clear) button.
- Defecate:** 大便 (Defecation). Input field shows 0. Includes a 清空 (Clear) button.
- Vomit:** 呕吐 (Vomiting). Input field shows 0. Includes a 清空 (Clear) button.
- Other records:** 症状记录 (Symptoms), 住院记录 (Hospitalization), 利尿药 (Diuretics).
- Save:** 保存 (Save) button at the bottom.

Red arrows point from the English labels on the left to the corresponding UI elements in the screenshot. A red bracket on the right groups the 'Urine', 'Defecate', and 'Vomit' sections under the label 'Emptying function'.

# How to Record?

Whether you choose breakfast, lunch, dinner or add meals, the following interface will appear.

**Return** →

**Search Box** →

**Sweet potato and beans, staple food** →

**Dishes, meat** →

**Eggs** →

**Vegetables** →

**Fruits** →

**Seafood** →

**Bean products** →

**Dairy** →

**Drinks** →

**Food categories**

# How to Record?

You can use the search function or select food categories.

**If you choose sweet potato and beans, staple food**

**The selection boxes for various kinds of food will appear**

**Return** →

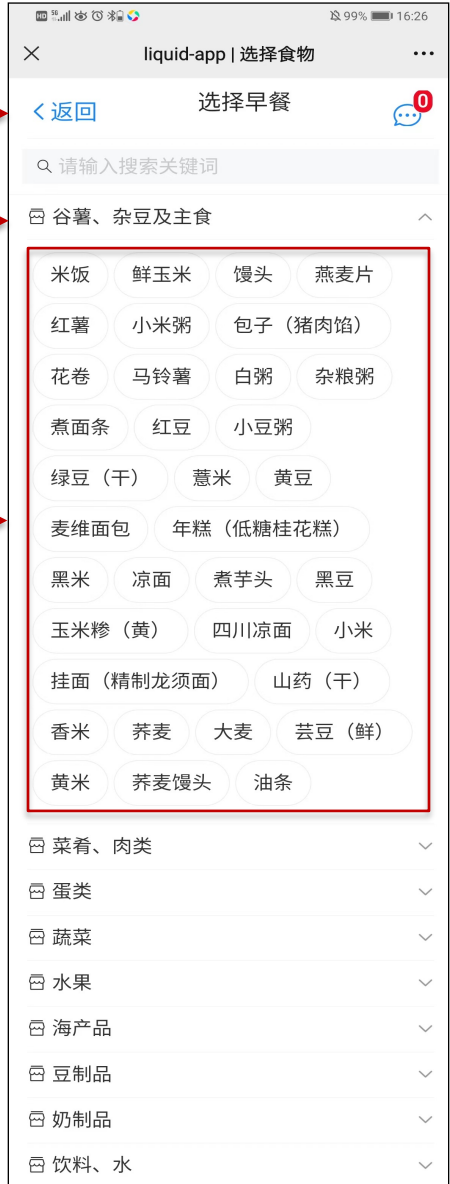



# How to Record?

You can choose the food you have eaten,  
for example steamed buns.

**Enter the number  
of steamed buns you eat** →

**Choose the unit of  
steamed bread you eat** →

**Save** →

liquid-app | 选择食物

< 返回 选择早餐

请输入搜索关键词

谷薯、杂豆及主食

米饭 鲜玉米 馒头 燕麦片

红薯 小米粥 包子 (猪肉馅)

花卷 马铃薯 白粥 杂粮粥

煮面条 红豆 小豆粥

输入数量和选择规格

请输入数量

|                |                                  |
|----------------|----------------------------------|
| 个 (51克)        | <input checked="" type="radio"/> |
| 个 (大、圆) (120克) | <input type="radio"/>            |
| 个 (大、方) (100克) | <input type="radio"/>            |
| 个 (小) (20克)    | <input type="radio"/>            |

保存

# How to Record?

After you save the food you eat, you can see a number in the upper right corner of the interface.

1

Click the number

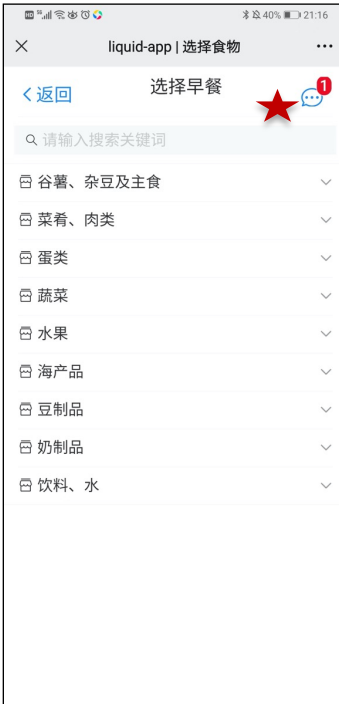

2

The food you eat will appear

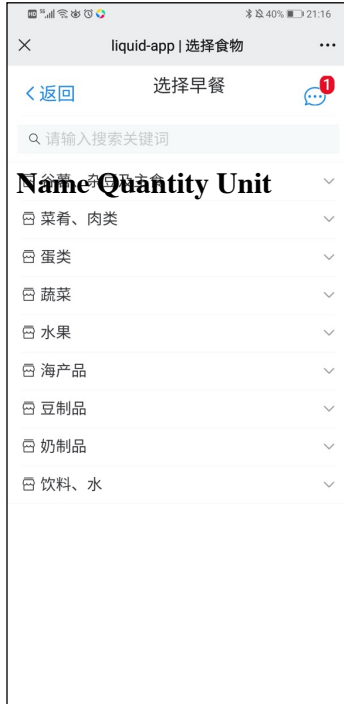

3

If you input wrong, slide left and delete

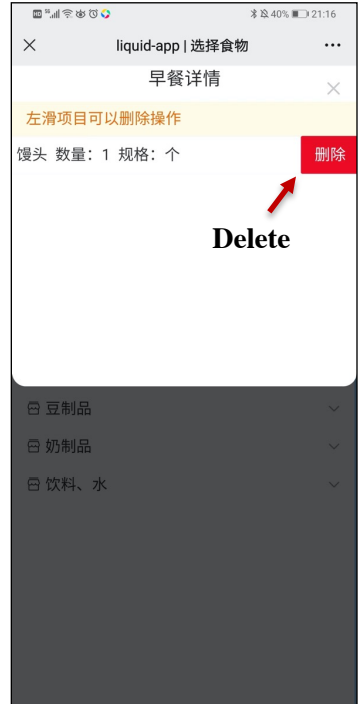

# How to Record?

## Tips

**The above shows the recording method of only one kind of food, and the recording methods of other foods are the same as above.**

# How to Record?

## Symptoms record

|                                     |   |                                       |                                    |                                    |            |
|-------------------------------------|---|---------------------------------------|------------------------------------|------------------------------------|------------|
| <b>Return</b>                       | → | < 返回                                  | 症状记录                               |                                    |            |
|                                     |   |                                       |                                    | <b>No</b>                          | <b>Yes</b> |
| <b>Edema</b>                        | → | 水肿:                                   | <input type="radio"/> 否            | <input checked="" type="radio"/> 是 |            |
| <b>Dyspnea</b>                      | → | 呼吸困难:                                 | <input checked="" type="radio"/> 否 | <input type="radio"/> 是            |            |
| <b>Fatigue</b>                      | → | 疲乏:                                   | <input type="radio"/> 否            | <input checked="" type="radio"/> 是 |            |
| <b>Gain weight</b>                  | → | 体重增加（在饮食运动习惯没有变化的情况下，3天内体重突然增加2kg以上）: | <input type="radio"/> 否            | <input checked="" type="radio"/> 是 |            |
| <b>Delicate appetite</b>            | → | 食欲不振:                                 | <input type="radio"/> 否            | <input checked="" type="radio"/> 是 |            |
| <b>Chest tightness, palpitation</b> | → | 胸闷、心悸:                                | <input checked="" type="radio"/> 否 | <input type="radio"/> 是            |            |
| <b>Other symptoms</b>               | → | 其他症状:                                 |                                    |                                    |            |
| <b>Save</b>                         | → | 保存                                    |                                    |                                    |            |

# How to Record?

## Tips

When you log in the next time after inputting symptoms, a box will automatically pop up in the main interface to ask whether your symptoms have changed. If there are changes, you can modify them directly in the message box, and then click OK. If not, click Cancel.

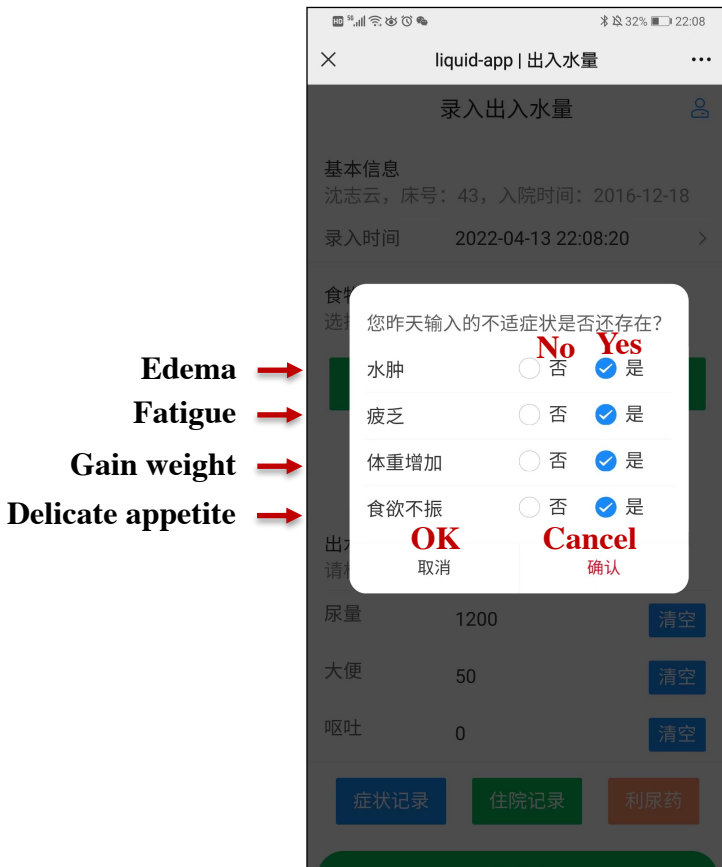

# How to Record?

## Hospitalization record

**Return** →

**Time of hospitalization** →

**Reason for hospitalization** →

**Outcome of hospitalization** →

**Save** →



liquid-app | 住院记录

< 返回 住院记录

住院时间: 2022-04-13 21:42:01 >

住院原因:  心脏病情加重 **Aggravation of HF**  
 其他疾病 **Other diseases**

其他疾病自定义

住院结局:  痊愈 **Heal**  
 好转 **Better**  
 无改变 **No change**  
 其他 **Other**

其他自定义

保存

# How to Record?

## Diuretic record

Return →

liquid-app | 利尿药记录

服用利尿药 Add  
添加

以下内容用于记录您口服利尿药的情况，如果用药情况发生改变，您可以随时修改并记录

|       |                         |                         |
|-------|-------------------------|-------------------------|
| 呋塞米:  | <input type="radio"/> 否 | <input type="radio"/> 是 |
|       | 每天__次                   |                         |
|       | 每次__毫克                  |                         |
| 螺内酯:  | <input type="radio"/> 否 | <input type="radio"/> 是 |
|       | 每天__次                   |                         |
|       | 每次__毫克                  |                         |
| 托拉塞米: | <input type="radio"/> 否 | <input type="radio"/> 是 |
|       | 每天__次                   |                         |
|       | 每次__毫克                  |                         |
| 氢氯噻嗪: | <input type="radio"/> 否 | <input type="radio"/> 是 |
|       | 每天__次                   |                         |
|       | 每次__毫克                  |                         |
| 吲达帕胺: | <input type="radio"/> 否 | <input type="radio"/> 是 |
|       | 每天__次                   |                         |
|       | 每次__毫克                  |                         |
| 托伐普坦: | <input type="radio"/> 否 | <input type="radio"/> 是 |
|       | 每天__次                   |                         |
|       | 每次__毫克                  |                         |
| 阿米洛利: | <input type="radio"/> 否 | <input type="radio"/> 是 |
|       | 每天__次                   |                         |
|       | 每次__毫克                  |                         |

保存

**Kinds of Diuretic**  
**How many times a day**  
**How many milligrams each time** →

Save →

# Data analysis and summary

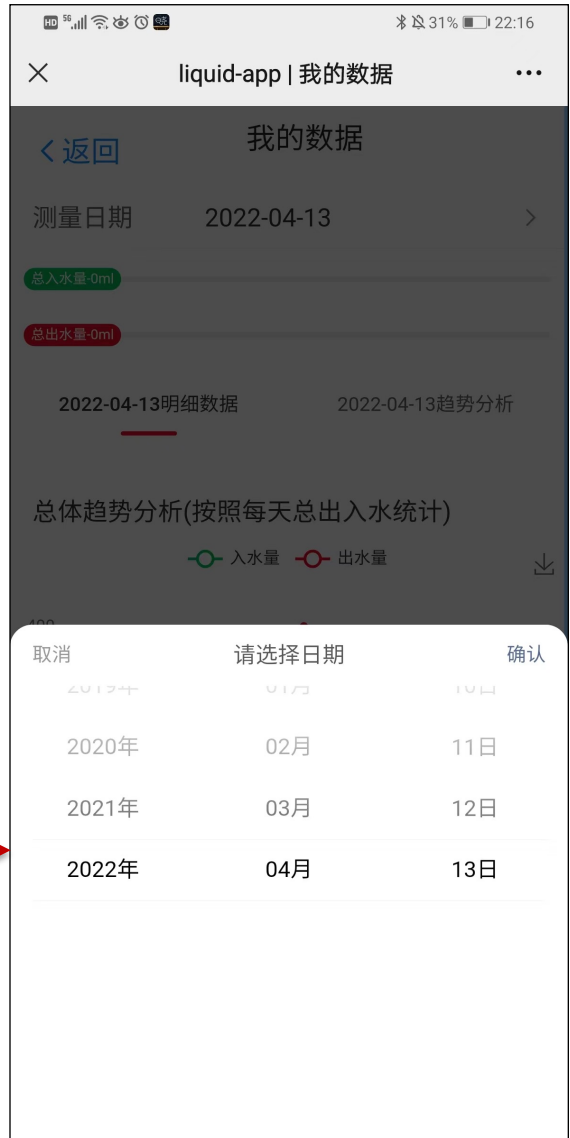

Slide to select date →



# Data analysis and summary

Total amount of fluid intake and outflow

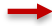

Detailed data of fluid intake and outflow

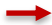

Daily trend of fluid intake and outflow

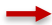

Patient self-reported symptoms

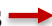

Patient self-reported hospitalization

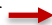

Patient self-reported diuretics usage

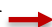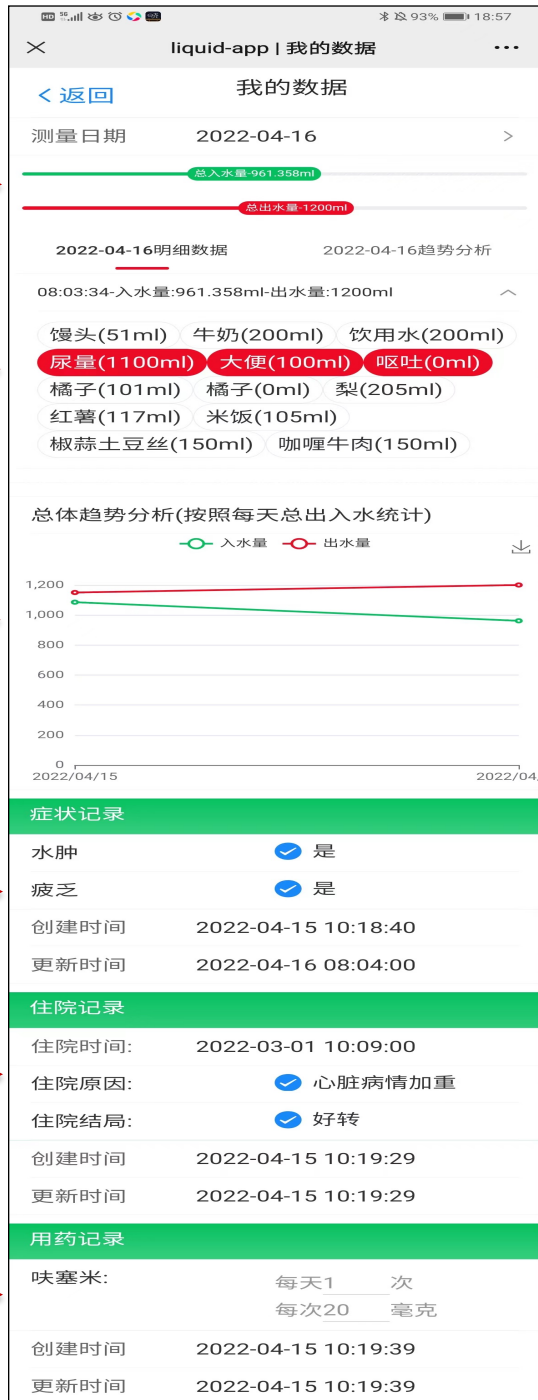

# **PART TWO**

## **For Medical Staff**

# How to log in?

**Method 1: Click the login link:**

<https://fluid.zs-hospital.sh.cn/#/doctorlogin>

**Method 2: Scan the WeChat QR code:**

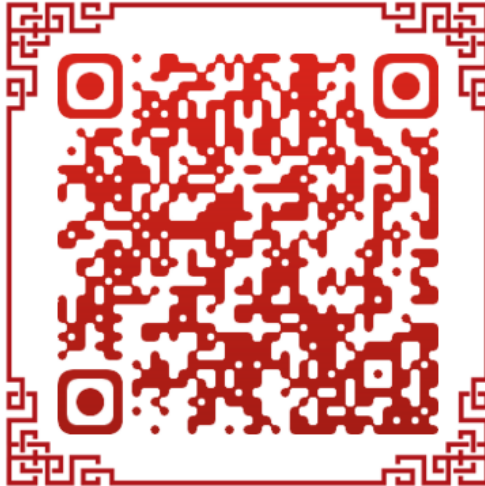

# How to log in?

**Account No.:** Medical record No.

**Password:** A unified password

**Account No.** →

**Password** →

**Login** →

liquid-app | 医护登录

中山医院出入水量自我管理App

\* 住院号 请输入住院号

\* 查询密码 医生查询密码

查询

© 复旦大学附属中山医院

# How to Record?

Based on the self-reported data by the patients, medical staff can also add and modify the data according to the actual situation of the patient.

**Basic info** →

**Start time** →

**End time** →

**Enter medical record No. and query** →

**Then, switch to another patient**

**Fluid intake: custom input** →

**Fluid outflow: custom input** →

**Save** →

The screenshot shows a mobile application interface for patient fluid management. The title bar at the top reads "liquid-app | 数据查询". Below the title bar, the main heading is "病人出入水量管理". The interface is divided into several sections:

- Basic info:** Displays "床号: 43, 入院时间: 2016-12-18".
- Start time:** Displays "起始时间 2022-04-14 08:27".
- End time:** Displays "截至时间 2022-04-14 08:27".
- Medical record No. and query:** Displays "住院号 1010694" with a green "查询" button.
- Fluid intake (ml):** Includes a green "增加" button and a note: "来自护理记录系统的数据可以根据实际情况增删".
- Fluid outflow (ml):** Includes green "增加" and blue "引流" buttons, and a note: "来自护理记录系统的数据可以根据实际情况增删".
- Fluid balance (ml):** Displays "出入水量(ml)" and "病患自报数据".
- Save:** A large green button at the bottom labeled "保存".

# Data analysis and summary

Total amount of fluid intake and outflow

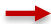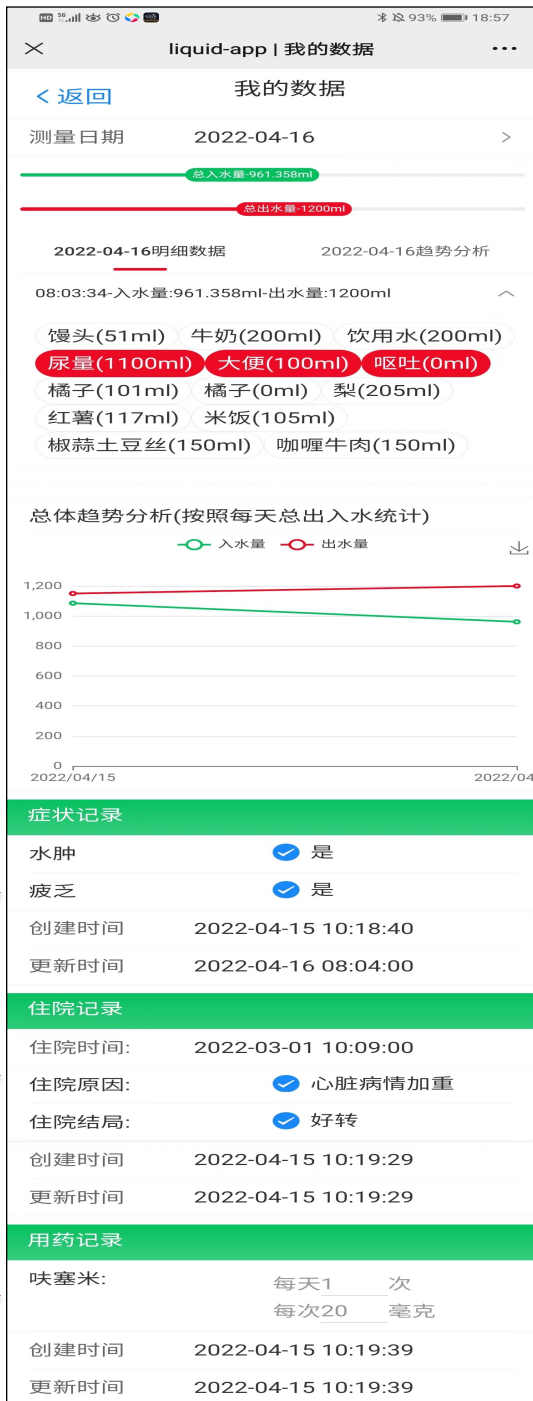

Detailed data of fluid intake and outflow

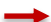

Daily trend of fluid intake and outflow

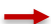

Patient self-reported symptoms

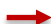

Patient self-reported hospitalization

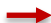

Patient self-reported diuretics usage

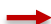

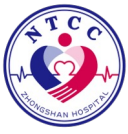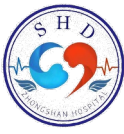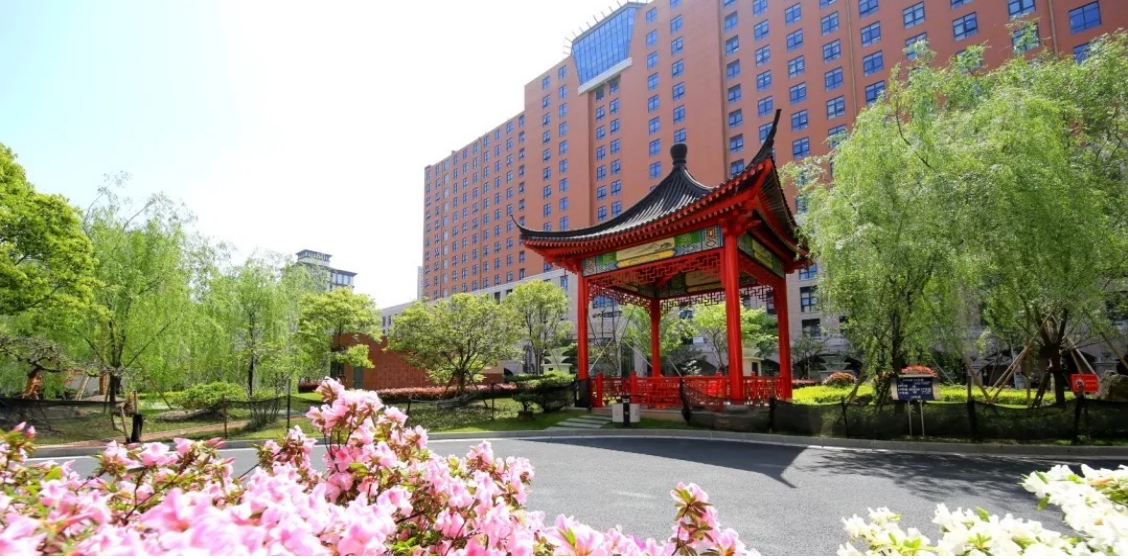

***Hand in hand to protect your heart!***

**Shanghai China**

**Zhongshan Hospital, Fudan university**
